# Supplementary material
Source: Royal Society of Chemistry journal article supplement (doi:10.1039/d6ay00648e)
Supplement: d6ay00648e1.pdf [file d6ay00648e1.pdf]

**Electronic Supplementary Material**

**Table S1** Results of artificially contaminated samples detection

| Number | Addition of <i>H. pylori</i><br>(CFU/mL) | <i>H. pylori</i><br>found<br>(CFU/mL) | Recovery rate<br>(%) | RSD (n=3,<br>%) |
|--------|------------------------------------------|---------------------------------------|----------------------|-----------------|
| 1      | 1                                        | 0.984                                 | 98.4                 | 3.7             |
| 2      | 100                                      | 104.00                                | 104.0                | 4.0             |
| 3      | 10000                                    | 10491.97                              | 104.9                | 4.6             |
